# Supplementary material for: Biophysical characterization of lutein or beta carotene-loaded cationic liposomes
Source: Royal Society of Chemistry journal article supplement (doi:10.1039/d0ra05683a), 2020-01-01
Supplement: d0ra05683a1.pdf [file d0ra05683a1.pdf]

## Supplementary Material

### Biophysical characterization of lutein or beta carotene-loaded cationic liposomes

Nourhan S. Elkholy,<sup>\*a</sup> Medhat W. Shafaa<sup>a</sup> and Haitham S. Mohammed<sup>b</sup>

a. Medical Biophysics Division, Physics Department, Faculty of Science, Helwan  
University, Cairo, Egypt

b. Biophysics Department, Faculty of Science, Cairo University, Giza, Egypt

In this Supplementary Information, three repeats of each TEM image were provided. In the following images, low magnification images are provided which show the morphology of a few particles, while the high magnification images focus on fewer particles (maximum three particles). Selection of the particles in the high-magnification images was based on the fact that these shapes appeared commonly in most of the captured images. The images provided below are from 3 independent samples for each formula.

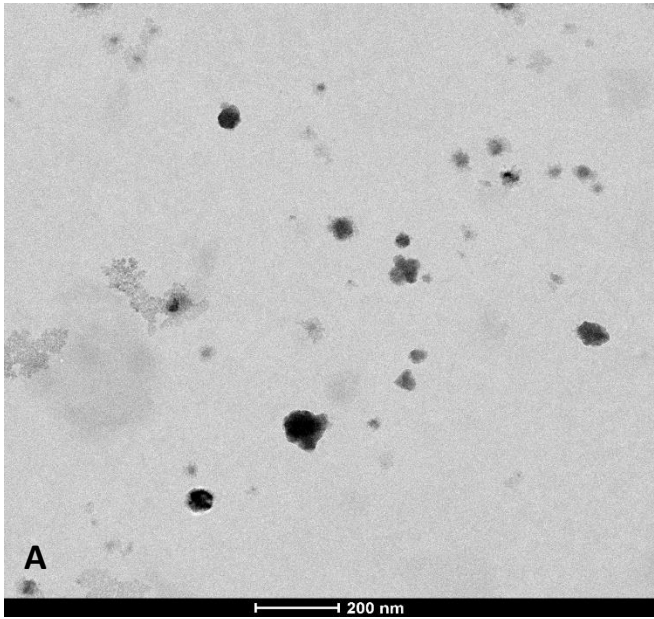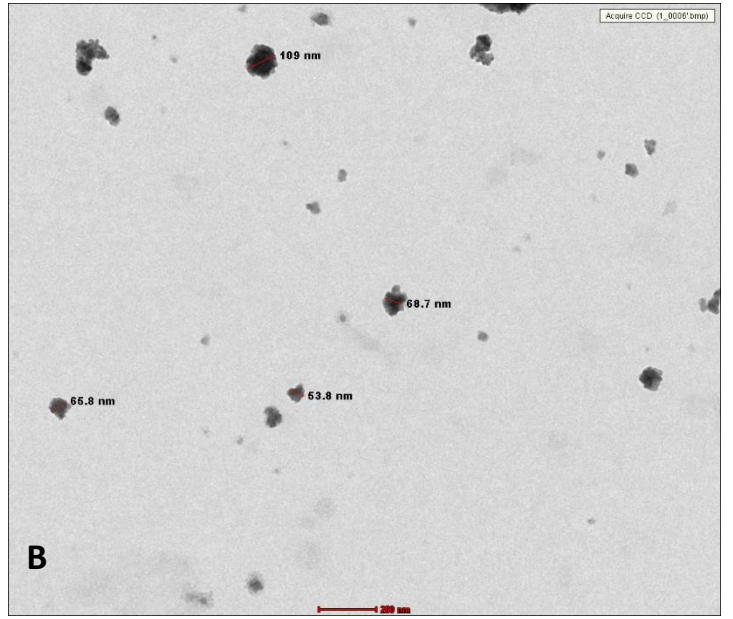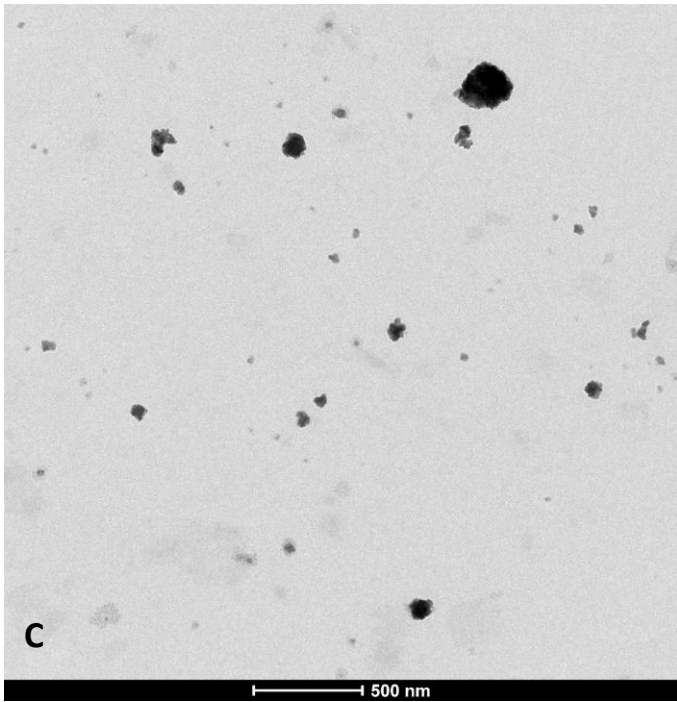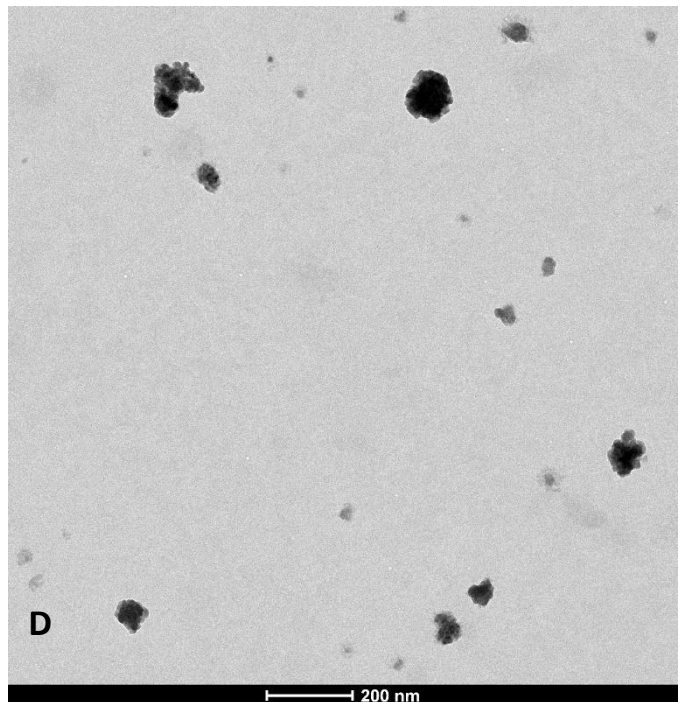

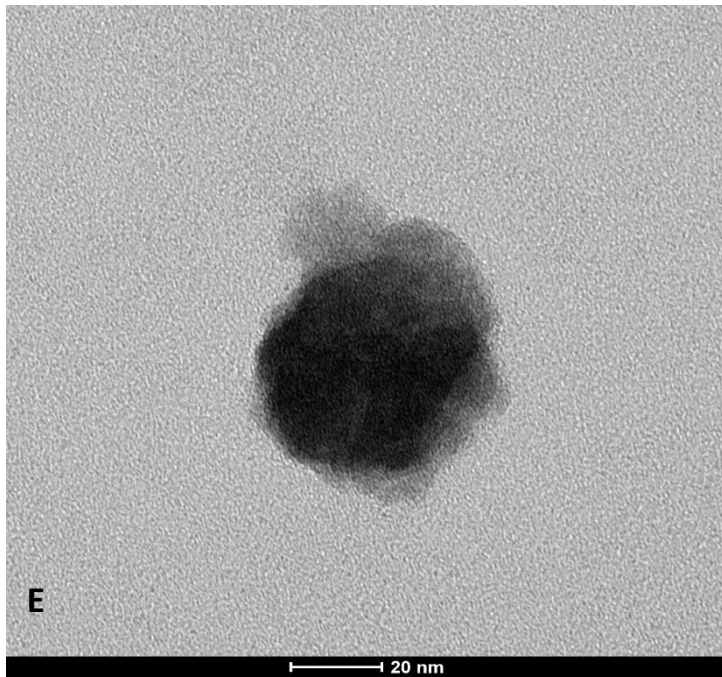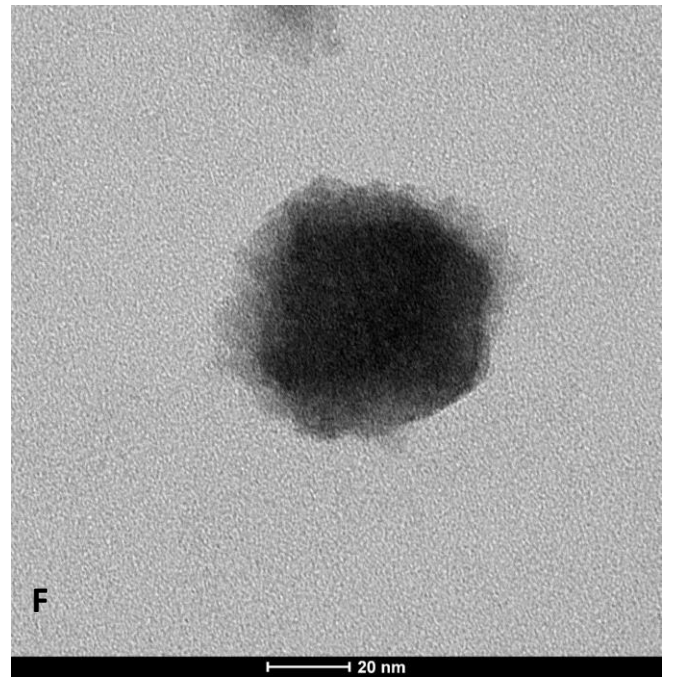

**Fig 1** TEM images showing the size of neutral liposomes (NL) which is not imparted with a surface charge at low magnification in A-D and at high magnification E & F.

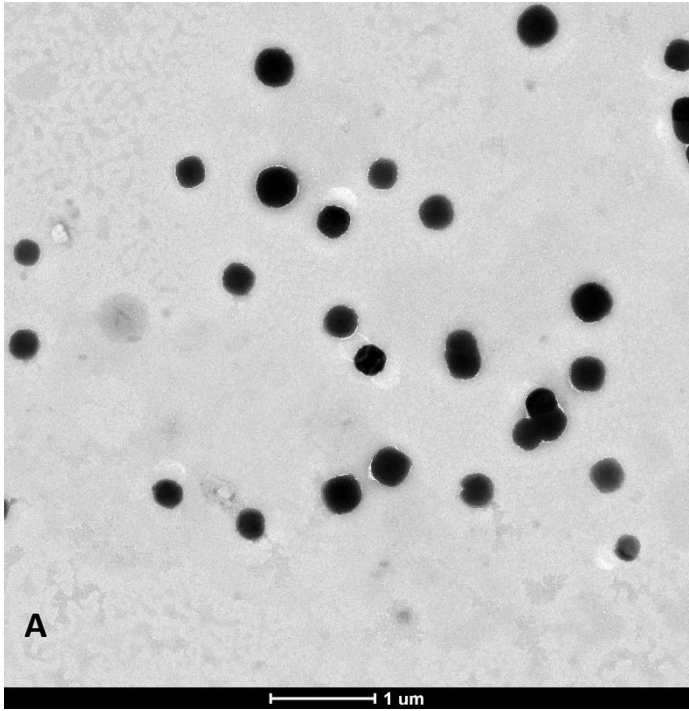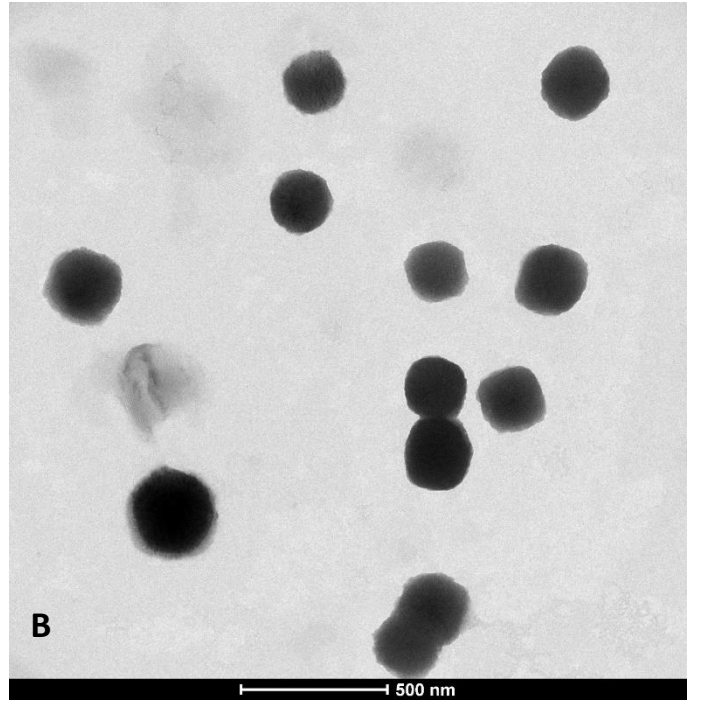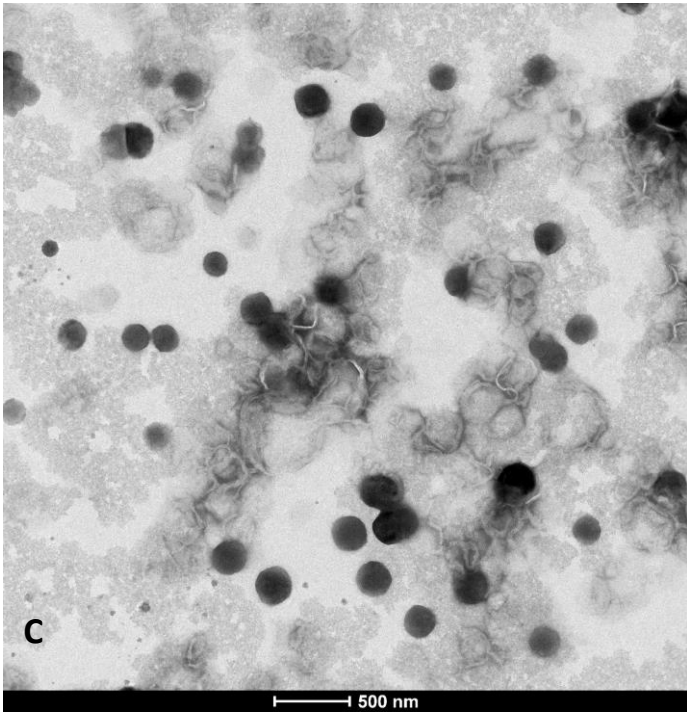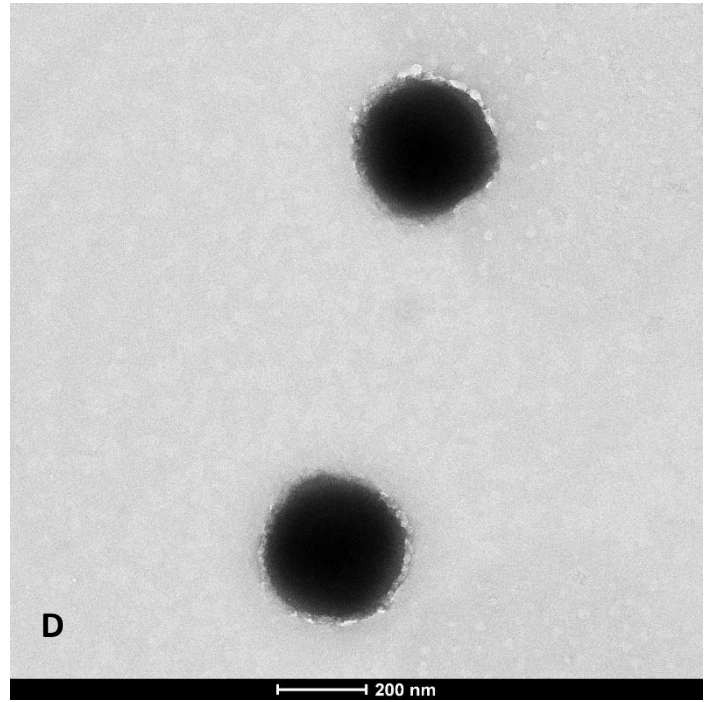



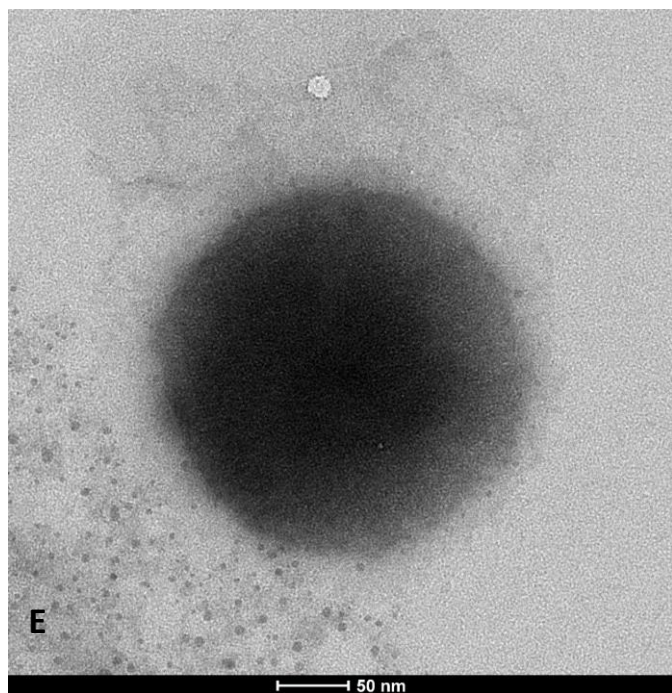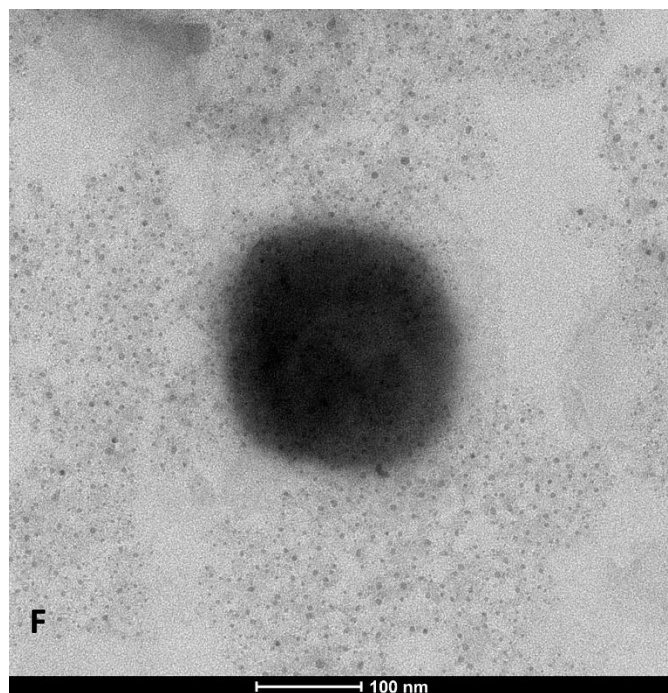

**Fig 2** TEM images showing cationic liposomes (CL) which is imparted with the positive surface charge at low magnification in A-D and at high magnification E & F.

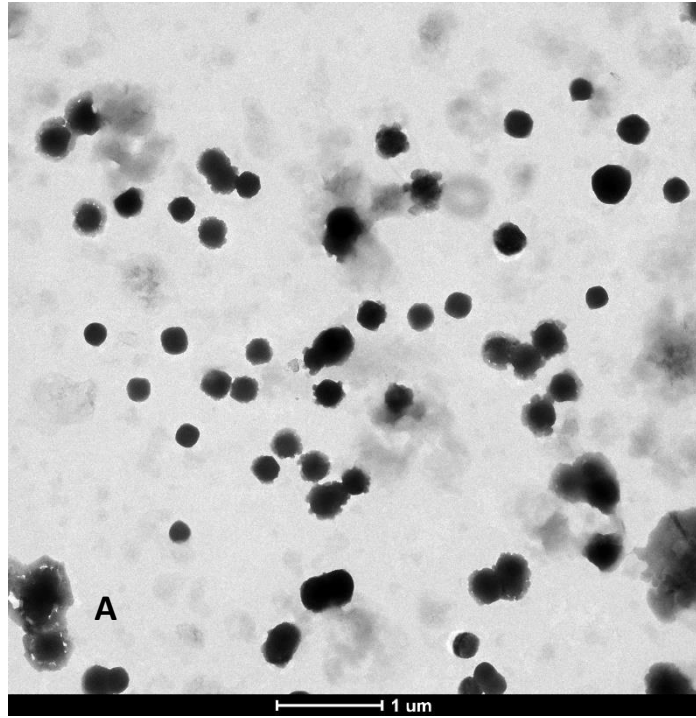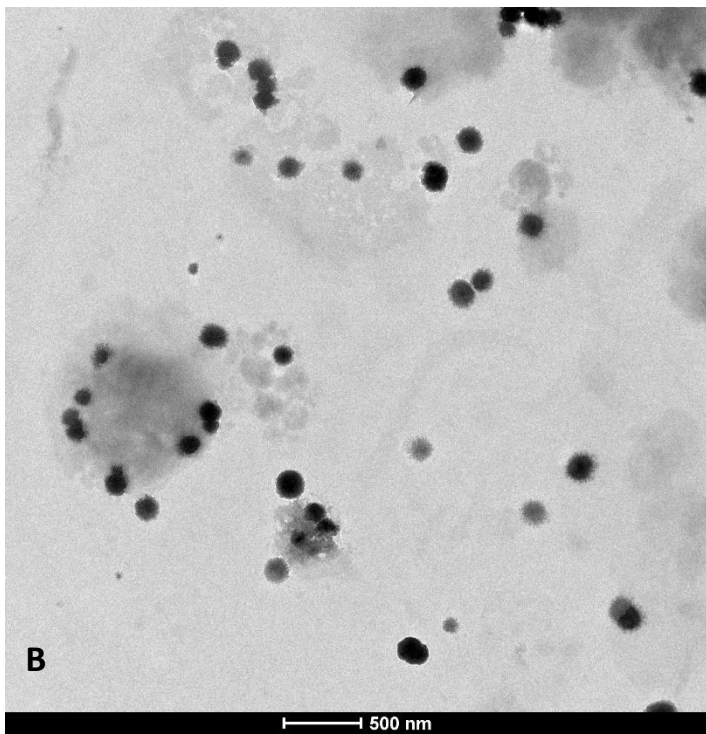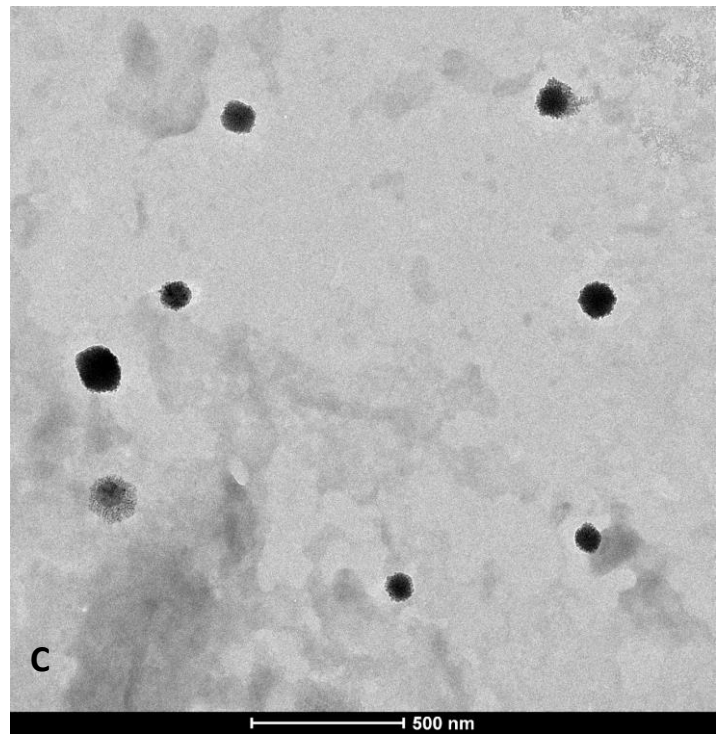

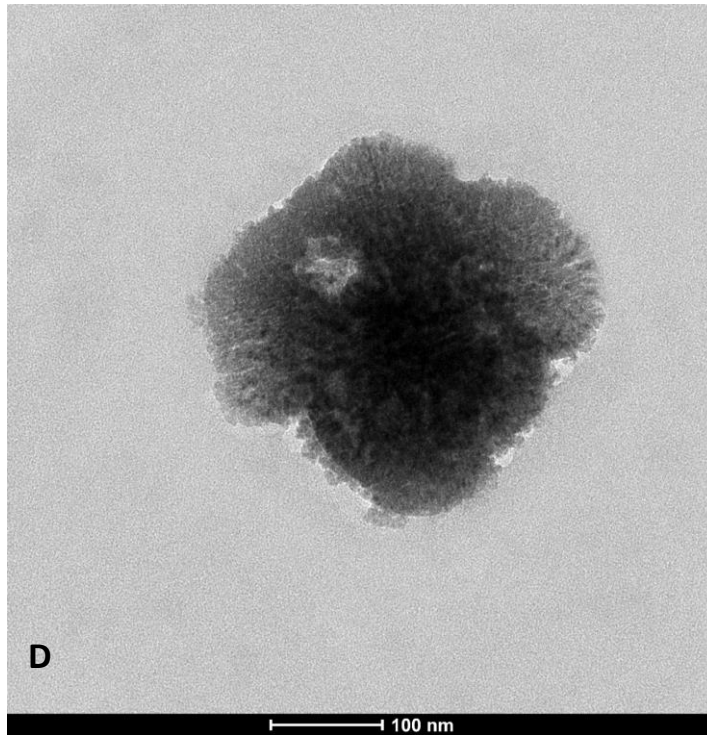

**Fig 3** TEM images showing the size of cationic liposomes incorporated with lutein (CL-Lut) at low magnification in A-C and at high magnification in D.

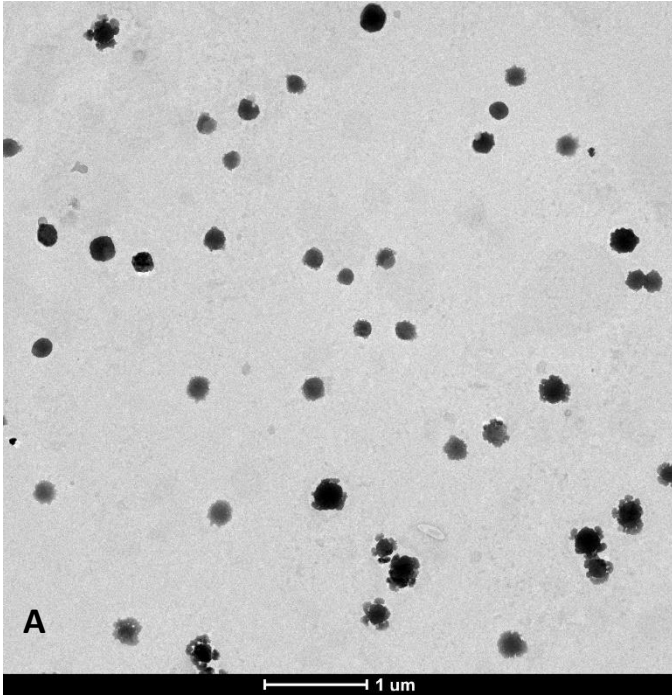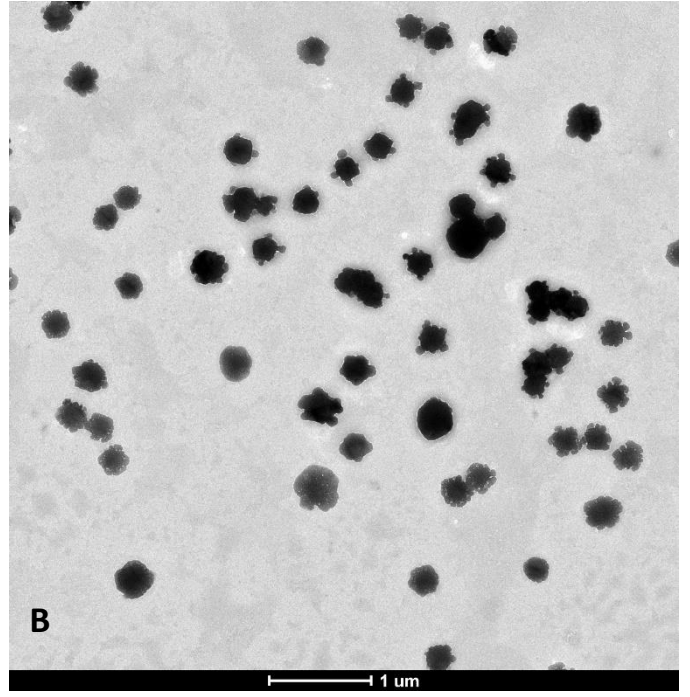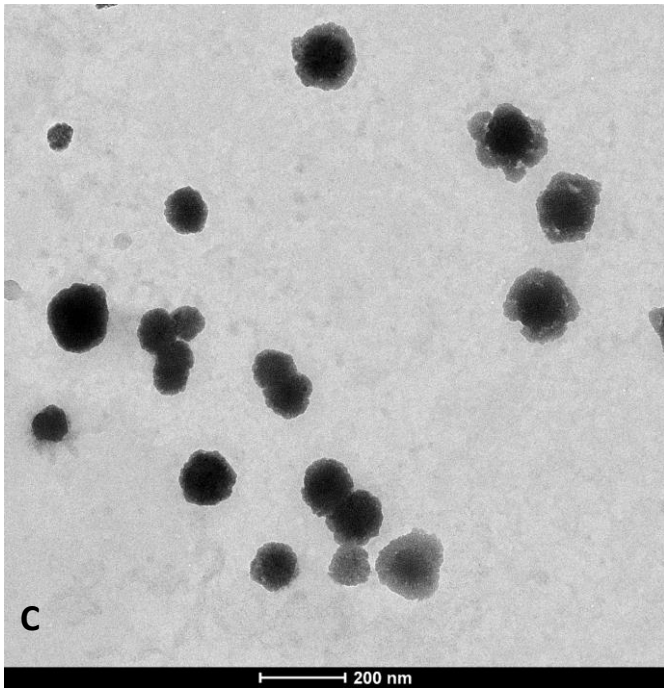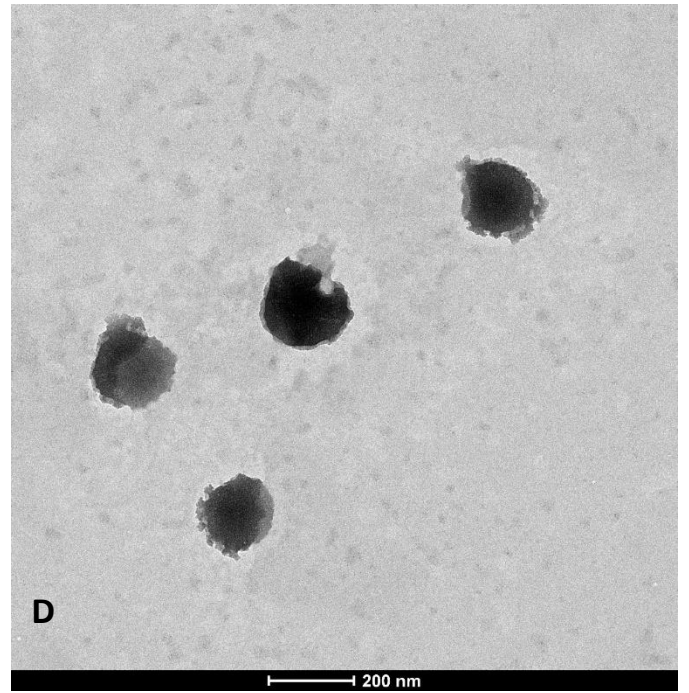



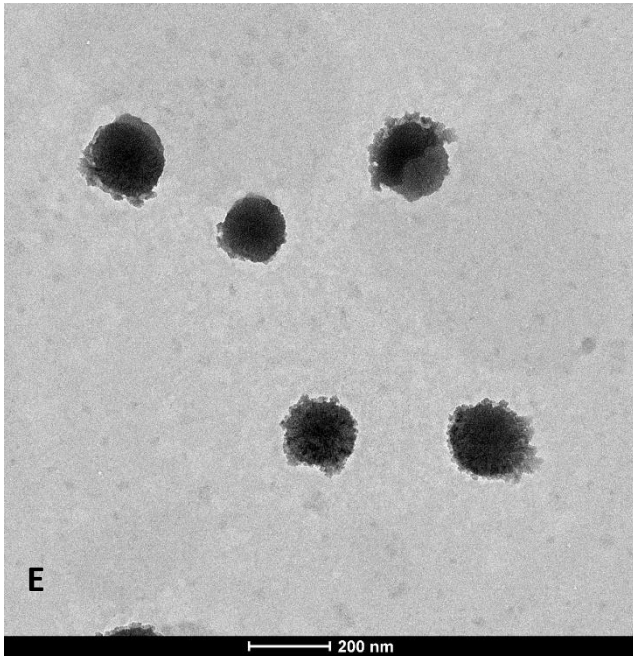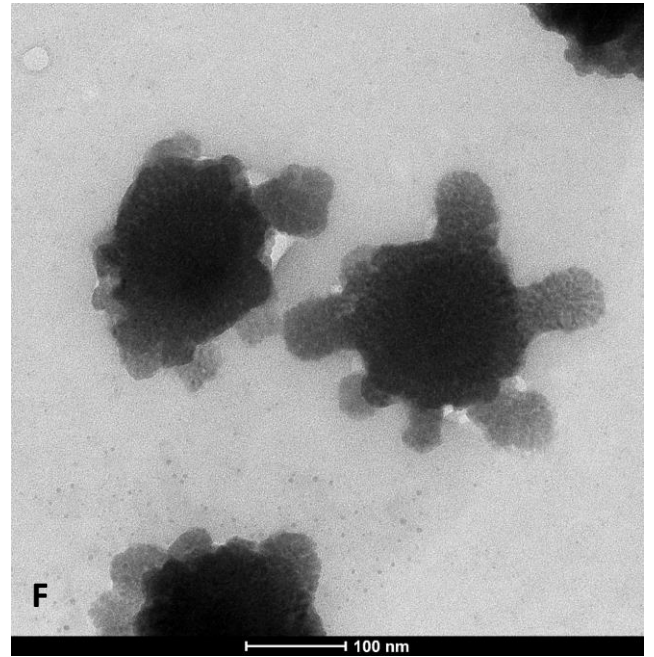

**Fig 4** TEM images showing the size of cationic liposomes incorporated with beta-carotene (CL-Bc) at low magnification in A-E and at high magnification in F. Beta-carotene was observed at the boundary surface within the liposomal assembly surface, the molecule of beta-carotene tends to be buried in a lipid bilayer in random distribution without any preferred orientation.
